# Supplementary material
Source: ML conference proceedings conference paper supplement (https://proceedings.mlr.press/v97/huang19e.html)
Supplement: Supplementary file 1 [file huang19e-supp.pdf]

### A. Proof of Lemma 3.5

*Proof.* Given a differentiable function  $F : \mathcal{F} \times \mathcal{F} \rightarrow \mathbb{R}$ , we define the Bregman divergence by

$$d_F(f, f') = F(f) - F(f') - \langle f - f', \nabla F(f') \rangle, \forall f, f' \in \mathcal{F}.$$

Define  $R : \mathcal{F} \rightarrow \mathbb{R}$  by

$$R(f) := \frac{1}{N} \sum_{i \in [N]} L(f, s_i) + \lambda \|f\|_k^2, \forall f \in \mathcal{F}.$$

Also define  $R^i : \mathcal{F} \rightarrow \mathbb{R}$  by

$$R^i(f) := \frac{1}{N} \left( \sum_{j \neq i} L(f, s_j) + L(f, s'_i) \right) + \lambda \|f\|_k^2, \forall f \in \mathcal{F}.$$

By definition of  $g$  and  $g^i$ , we have

$$\begin{aligned} d_R(g^i, g) &= R(g^i) - R(g) - \langle g^i - g, \nabla R(g) \rangle \\ &\leq R(g^i) - R(g), \end{aligned} \quad (5)$$

and

$$\begin{aligned} d_{R^i}(g, g^i) &= R^i(g) - R^i(g^i) - \langle g - g^i, \nabla R^i(g^i) \rangle \\ &\leq R^i(g) - R^i(g^i). \end{aligned} \quad (6)$$

By Inequalities (5) and (6), we have

$$\begin{aligned} &d_R(g^i, g) + d_{R^i}(g, g^i) \\ &\leq R(g^i) - R(g) + R^i(g) - R^i(g^i) \\ &= \frac{1}{N} (L(g^i, s_i) - L(g, s_i) + L(g, s'_i) - L(g^i, s'_i)). \end{aligned} \quad (7)$$

Since  $d_{A+B} = d_A + d_B$ , we have

$$\begin{aligned} &2\lambda \|g - g^i\|_k^2 \\ &= \lambda d_{\|\cdot\|_k^2}(g, g^i) + \lambda d_{\|\cdot\|_k^2}(g^i, g) \\ &\quad (\text{Defn. of } \|\cdot\|_k^2) \\ &= d_{R^i}(g, g^i) - d_{\sum_{j \neq i} L(\cdot, s_j)}(g, g^i) \\ &\quad + d_R(g^i, g) - d_{\sum_{i \in [N]} L(\cdot, s_i)}(g^i, g) \\ &\quad (d_{A+B} = d_A + d_B) \\ &\leq d_{R^i}(g, g^i) + d_R(g^i, g) \\ &\quad (\text{nonnegativity of } d_F) \\ &\leq \frac{1}{N} (L(g^i, s_i) - L(g, s_i) + L(g, s'_i) - L(g^i, s'_i)) \\ &\leq \frac{\sigma}{N} (|g(x_i) - g^i(x_i)| + |g(x'_i) - g^i(x'_i)|). \\ &\quad (L(\cdot, \cdot) \text{ is } \sigma\text{-admissible}) \end{aligned} \quad (8)$$

This completes the proof.  $\square$

### B. Proof of Theorem 3.7

*Proof.* By Inequality (8) in the proof of Lemma 3.5, we have

$$\begin{aligned} &2\lambda \|v - v^i\|_2^2 \\ &\leq \frac{1}{N} (L(g^i, s_i) - L(g, s_i) + L(g, s'_i) - L(g^i, s'_i)). \end{aligned} \quad (9)$$

Moreover, we have for any  $f = \alpha \cdot \phi(\cdot)$ ,  $f' = \alpha' \cdot \phi(\cdot) \in \mathcal{F}$  and  $s \in \mathcal{D}$ ,

$$\begin{aligned} L(f, s) - L(f', s) &\leq \langle \nabla_\alpha L(f, s), \alpha - \alpha' \rangle \\ &\quad (\text{Convexity of } L(\cdot, s)) \\ &\leq \|\nabla_\alpha L(\alpha, s)\|_2 \cdot \|\alpha - \alpha'\|_2 \\ &\leq G \|\alpha - \alpha'\|_2 \\ &\quad (\text{Defn. of } G). \end{aligned} \quad (10)$$

Combining with Inequalities (9) and (6), we have

$$\begin{aligned} &\|v - v^i\|_2^2 \\ &\leq \frac{1}{2\lambda N} (L(g^i, s_i) - L(g, s_i) + L(g, s'_i) - L(g^i, s'_i)) \\ &\quad (\text{Ineq. (9)}) \\ &\leq \frac{1}{2\lambda N} (G\|v - v^i\|_2 + G\|v - v^i\|_2) \\ &\quad (\text{Ineq. (10)}) \\ &= \frac{G}{\lambda N} \|v - v^i\|_2. \end{aligned}$$

It implies that  $\|v - v^i\|_2 \leq \frac{G}{\lambda N}$ . Combining with Inequality (6), we have for any  $s \in \mathcal{D}$ ,

$$L(g, s) - L(g^i, s) \leq G\|v - v^i\|_2 \leq \frac{G^2}{\lambda N}.$$

This completes the proof for the stability guarantee. For the sacrifice in the empirical risk, the argument is the same as that of Theorem 3.2.  $\square$

### C. Details of Remark 3.3

- Prediction error:  $f(x) \in \{-1, 1\}$  for any pair  $(f, x)$  and  $L(f(x), y) = \mathbb{I}[f(x) \neq y]$ ,<sup>5</sup> then we have that

$$\begin{aligned} &|L(f(x), y) - L(f(x'), y)| \\ &= |\mathbb{I}[f(x) \neq y] - \mathbb{I}[f(x') \neq y]| \\ &= \mathbb{I}[f(x) \neq f(x')] = \frac{1}{2} |f(x) - f(x')|, \end{aligned}$$

which is  $\frac{1}{2}$ -admissible.

<sup>5</sup>Here,  $\mathbb{I}[\cdot]$  is the indicator function.

- Soft margin SVM:  $L(f, s) = (1 - yf(x))_+$ ,<sup>6</sup> then we have that

$$\begin{aligned} & |L(f(x), y) - L(f(x'), y)| \\ &= |(1 - yf(x))_+ - (1 - yf(x'))_+| \\ &\leq |yf(x) - yf(x')| \\ &= |f(x) - f(x')|, \end{aligned}$$

which is 1-admissible.

- Least Squares regression:  $L(f, s) = (f(x) - y)^2$ . Suppose  $f(x) \in [-1, 1]$  for any  $x \in \mathcal{X}$ , then we have that

$$\begin{aligned} & |L(f(x), y) - L(f(x'), y)| \\ &= |(f(x) - y)^2 - (f(x') - y)^2| \\ &= |(f(x) + f(x') - 2y)(f(x) - f(x'))| \\ &\leq 4|f(x) - f(x')|, \end{aligned}$$

which is 4-admissible.

- Logistic regression:  $L(f, s) = \ln(1 + e^{-yf(x)})$ . Note that we have for any  $x \in \mathcal{X}$  and  $y \in \{-1, 1\}$ ,

$$\begin{aligned} & \left| \nabla_{f(x)} \ln(1 + e^{-yf(x)}) \right| \\ &= \left| \frac{-ye^{-yf(x)}}{1 + e^{-yf(x)}} \right| = \left| \frac{e^{-yf(x)}}{1 + e^{-yf(x)}} \right| \leq 1. \end{aligned}$$

Hence, the loss function  $L(f, s) = \ln(1 + e^{-yf(x)})$  is 1-admissible.

## D. Analysis of Our Framework in Specified Settings

Next, we show the stability guarantee of our framework in several specified models. We mainly analyze three commonly-used models: soft margin SVMs, least squares regression, and logistic regression.

**Soft margin SVMs.** Recall that  $S = \{s_i = (x_i, z_i, y_i)\}_{i \in [N]}$  is the given training set. We first have a kernel function  $k(\cdot, \cdot)$  that defines values  $k(x_i, x_j)$ . Then each classifier  $f$  is a linear combination of  $k(x_i, \cdot)$ , i.e.,

$$f(\cdot) = \sum_{i \in [N]} \alpha_i k(x_i, \cdot)$$

for some  $\alpha \in \mathbb{R}^N$ . In the soft margin SVM model, we consider the following loss function

$$L(f, s) = (1 - yf(x))_+$$

<sup>6</sup> $(a)_+ = a$  if  $a \geq 0$  and otherwise  $(a)_+ = 0$ .

which is 1-admissible. Then Program (Stable-Fair) can be rewritten as follows.

$$\begin{aligned} & \min_{\alpha \in \mathbb{R}^N} \sum_{i \in [N]} \left( 1 - y_i \sum_{j \in [N]} \alpha_j k(x_j, x_i) \right)_+ \\ & + \lambda \left\| \sum_{i, j \in [N]} \alpha_i \alpha_j k(x_i, x_j) \right\|_k^2 \quad s.t. \\ & \Omega(f) \leq 0. \end{aligned} \quad (\text{SVM})$$

This model has been considered in (Zafar et al., 2017b;a) that aims to avoid disparate impact/disparate mistreatment. Applying Theorems 3.2 and 3.7, and the fact that  $L(\cdot, \cdot)$  is 1-admissible (Remark 3.3), we directly have the following corollary.

**Corollary D.1.** *Suppose the learning algorithm  $\mathcal{A}$  computes a minimizer  $\mathcal{A}_S$  of Program (SVM).*

- If  $k(x_i, x_i) \leq \kappa^2 < \infty$  for each  $i \in [N]$ , then  $\mathcal{A}$  is  $\frac{\kappa^2}{\lambda N}$ -uniformly stable.
- Let  $G = \sup_{f = \alpha^\top \phi(\cdot) \in \mathcal{F}: \Omega(f) \leq 0} \sup_{s \in \mathcal{D}} \|\nabla_\alpha L(f, s)\|_2$ . Then  $\mathcal{A}$  is  $\frac{G^2}{\lambda N}$ -uniformly stable.

**Least square regression.** The only difference from soft margin SVM is the loss function, which is defined as follows.

$$L(f, s) = (f(x) - y)^2.$$

Then Program (Stable-Fair) can be rewritten as follows.

$$\begin{aligned} & \min_{\alpha \in \mathbb{R}^N} \sum_{i \in [N]} \left( y_i - \sum_{j \in [N]} \alpha_j k(x_j, x_i) \right)^2 \\ & + \lambda \left\| \sum_{i, j \in [N]} \alpha_i \alpha_j k(x_i, x_j) \right\|_k^2 \quad s.t. \\ & \Omega(f) \leq 0. \end{aligned} \quad (\text{LS})$$

Applying Theorems 3.2 and 3.7, we have the following corollary.

**Corollary D.2.** *Suppose the learning algorithm  $\mathcal{A}$  computes a minimizer  $\mathcal{A}_S$  of Program (LS).*

- If  $B = \max_{x \in \mathcal{X}} |f(x)|$  and  $k(x_i, x_i) \leq \kappa^2 < \infty$  for each  $i \in [N]$ , then  $\mathcal{A}$  is  $\frac{(2B+2)^2 \kappa^2}{\lambda N}$ -uniformly stable.
- Let  $G = \sup_{f = \alpha^\top \phi(\cdot) \in \mathcal{F}: \Omega(f) \leq 0} \sup_{s \in \mathcal{D}} \|\nabla_\alpha L(f, s)\|_2$ . Then  $\mathcal{A}$  is  $\frac{G^2}{\lambda N}$ -uniformly stable.

*Proof.* We only need to verify that  $L(\cdot, \cdot)$  is  $(2B + 2)$ -

admissible. For any  $x, x' \in \mathcal{X}$  and  $y \in \{-1, 1\}$ , we have

$$\begin{aligned} & |(f(x) - y)^2 - (f(x') - y)^2| \\ &= |(f(x) - f(x')) \cdot (f(x) + f(x') - 2y)| \\ &\leq (|f(x)| + |f(x')| + 2) \cdot |f(x) - f(x')| \\ &\leq (2B + 2) |f(x) - f(x')|. \end{aligned}$$

This completes the proof.  $\square$

**Logistic regression.** Again, the only difference from soft margin SVM is the loss function, which is defined as follows.

$$L(f, s) = \ln(1 + e^{-yf(x)}).$$

This model has been widely used in the literature (Zafar et al., 2017b;a; Goel et al., 2018). Then Program (Stable-Fair) can be rewritten as follows.

$$\begin{aligned} & \min_{\alpha \in \mathbb{R}^N} \sum_{i \in [N]} \ln \left( 1 + y_i \cdot e^{-\sum_{j \in [N]} \alpha_j k(x_j, x_i)} \right) \\ & + \lambda \left\| \sum_{i, j \in [N]} \alpha_i \alpha_j k(x_i, x_j) \right\|_k^2 \quad \text{s.t.} \quad (\text{LR}) \\ & \Omega(f) \leq 0. \end{aligned}$$

Applying Theorem 3.2 and 3.7, and the fact that  $L(\cdot, \cdot)$  is 1-admissible (Remark 3.3), we have the following corollary.

**Corollary D.3.** *Suppose the learning algorithm  $\mathcal{A}$  computes a minimizer  $\mathcal{A}_S$  of Program (LR).*

- *If  $k(x_i, x_i) \leq \kappa^2 < \infty$  for each  $i \in [N]$ , then  $\mathcal{A}$  is  $\frac{\kappa^2}{\lambda N}$ -uniformly stable.*
- *Let  $G = \sup_{f = \alpha^\top \phi(\cdot) \in \mathcal{F}: \Omega(f) \leq 0} \sup_{s \in \mathcal{D}} \|\nabla_\alpha L(f, s)\|_2$ . Then  $\mathcal{A}$  is  $\frac{G^2}{\lambda N}$ -uniformly stable.*
